# Supplementary material for: Identifying Eating Occasion-Based Opportunities to Improve the Overall Diets of Australian Adolescents
Source: MDPI journal article supplement (doi:10.3390/nu9060608), 2017-06-14
Supplement: s1 [file s1]

Supplemental Table S1: Food grouping definitions for the 52 foods groups.

| Name                                              | Description <sup>1</sup>                                                                                                                                                                     | 8-Digit Food Codes Included <sup>2</sup>                                                                                                                                                                                                                                                                                                                                 |
|---------------------------------------------------|----------------------------------------------------------------------------------------------------------------------------------------------------------------------------------------------|--------------------------------------------------------------------------------------------------------------------------------------------------------------------------------------------------------------------------------------------------------------------------------------------------------------------------------------------------------------------------|
| Tea and coffee                                    | Tea and coffee without milk, coffee beverages including milk (cappuccino or flat white)                                                                                                      | 11101001-11209005                                                                                                                                                                                                                                                                                                                                                        |
| Fruit and vegetable juice                         | Commercial and non-commercial juices                                                                                                                                                         | 11301001-11306003                                                                                                                                                                                                                                                                                                                                                        |
| Sweetened beverages                               | Fruit drinks, cordials, soft drinks, flavored mineral waters, sports drinks, and energy drinks                                                                                               | 11307001-11604003                                                                                                                                                                                                                                                                                                                                                        |
| Water                                             | Unflavored water                                                                                                                                                                             | 11701001-11703001                                                                                                                                                                                                                                                                                                                                                        |
| Liquid breakfast, fortified beverages (like Milo) | Milo prepared with milk, unfortified beverage flavourings prepared with milk, beverage bases unmixed, and breakfast cereal beverages                                                         | 11801001-11806002                                                                                                                                                                                                                                                                                                                                                        |
| Rice, grains and flours                           | Oats, rice, quinoa and couscous without additions                                                                                                                                            | 12101001-12104002                                                                                                                                                                                                                                                                                                                                                        |
| Breads and rolls                                  | Bagels, bread, English muffins, and flat breads                                                                                                                                              | 12201001-12305006;<br>12307001-12307004                                                                                                                                                                                                                                                                                                                                  |
| Desserts                                          | Sweet buns, sweet biscuits, cakes, cupcakes, banana breads, cake-style muffins with chocolate, pudding, pie, danishes, éclairs, doughnuts, ice cream, toppings, pavlova, and ice confections | 12305007-12305010;<br>12306001-12306009;<br>13101001-13107001;<br>13301001-13303077;<br>13304011-13304014;<br>13304018-13304019;<br>13305001-13306029;<br>13308003;<br>13309001-13309004;<br>13402001-13403021;<br>13605001-13605011;<br>16901001-16901007;<br>19501001-19508011;<br>19601001-19602007;<br>19701001-19702007;<br>27103001-27103006;<br>27301001-27304015 |
| Pasta and noodles                                 | Pasta and noodles without additions. Filled pasta (meat, spinach, cheese, vegetables)                                                                                                        | 12401001-12404004                                                                                                                                                                                                                                                                                                                                                        |
| Breakfast cereal                                  | Ready-to-eat breakfast cereals and muesli                                                                                                                                                    | 12501001-12516003                                                                                                                                                                                                                                                                                                                                                        |
| Hot porridge                                      | Porridge with and without (milk, sugar, honey and dried fruit)                                                                                                                               | 12601001-12602003                                                                                                                                                                                                                                                                                                                                                        |
| Savory biscuits                                   | Crackers, wafers, rice cakes, and crispbreads,                                                                                                                                               | 13201001-13205003                                                                                                                                                                                                                                                                                                                                                        |
| Muffins and scones                                | Un-iced cake-style muffins and scones                                                                                                                                                        | 13304001-13304010;<br>13304015-13304017;<br>13304020-13304021;<br>13307001-13308002                                                                                                                                                                                                                                                                                      |
| Savory pastries                                   | Croissants, quiche, pastries filled with vegetables or meat, meat pies, sausage rolls, samosas, and spring rolls                                                                             | 13401001-13401024;<br>13404001-13406017                                                                                                                                                                                                                                                                                                                                  |
| Pizza                                             | Pizza with and without toppings                                                                                                                                                              | 13501001-13502022                                                                                                                                                                                                                                                                                                                                                        |
| Sandwiches                                        | Sandwiches, filled bread rolls, hot dogs, kebab wrap, and wraps                                                                                                                              | 13503001-13504007                                                                                                                                                                                                                                                                                                                                                        |
| Burgers                                           | Bacon burgers, chicken burgers, fish burgers, hamburgers, English muffins with egg, cheese and or beef/bacon, steak sandwiches, vegetable or lentil burgers                                  | 13505001-13506006                                                                                                                                                                                                                                                                                                                                                        |
| Tacos                                             | Tacos, nachos, Mexican-style wraps                                                                                                                                                           | 13507001-13508012                                                                                                                                                                                                                                                                                                                                                        |
| Pasta and dumpling dishes                         | Lasagna, macaroni and cheese, pasta with sauce, stir-fry with rice noodles, steamed buns                                                                                                     | 13509001-13510008;<br>13513001-13513007;<br>13515001-13515006                                                                                                                                                                                                                                                                                                            |
| Rice dishes and sushi                             | Paella, rice with (meat, eggs and/or vegetables), risotto, sushi with (fish, chicken, prawns, or vegetables)                                                                                 | 13511001-13511030;<br>13514001-13514023                                                                                                                                                                                                                                                                                                                                  |
| Batter-based products                             | Crepes, pancakes, pikelet, waffles, fritters, Yorkshire pudding, crumpets without additions.                                                                                                 | 13601001-13604010;<br>13606001-13606003                                                                                                                                                                                                                                                                                                                                  |
| Fats and oils                                     | Butter, margarine, and oils                                                                                                                                                                  | 14101001-14602008                                                                                                                                                                                                                                                                                                                                                        |
| Fish and fish mixed dish                          | Fish (baked, boiled, roasted, smoked, battered, and fried). Crabs, prawns, scallops, squid, and canned fish. Fish casseroles, and seafood stir-fry.                                          | 15101001-15604005                                                                                                                                                                                                                                                                                                                                                        |

|                               |                                                                                                                                                                                |                                                                                                                                                                                                   |
|-------------------------------|--------------------------------------------------------------------------------------------------------------------------------------------------------------------------------|---------------------------------------------------------------------------------------------------------------------------------------------------------------------------------------------------|
| Fruit                         | Raw fruits and fruit salads                                                                                                                                                    | 16101001-16101020;<br>16103001-16103011;<br>16105001-16105002;<br>16201001-16201012;<br>16301001-16303005;<br>16401001-16401011;<br>16403001-16403006;<br>16501001-16504012;<br>16601001-16701032 |
| Commercial fruit, dried fruit | Canned fruits (drained, with juice, or syrup), and dried fruits                                                                                                                | 16102001;<br>16104001-16104013;<br>16202001-16202010;<br>16304001-16304004;<br>16402001-16402013;<br>16404001-16404018;<br>16505001-16505010;<br>16702001-16702015;<br>16801001-16804004          |
| Eggs and egg dishes           | Eggs, eggs with additions (bacon, cheese). Frittatas, omelettes, and eggs benedict                                                                                             | 17101001- 17202003                                                                                                                                                                                |
| Meat                          | Beef, lamb, pork, veal, kangaroo, chicken, duck, sausages (beef, pork, chicken)                                                                                                | 18101001-18503009                                                                                                                                                                                 |
| Processed meat                | Bacon, ham, prosciutto, salami, corned beef, turkey deli-sliced, spam, and beef jerky                                                                                          | 18601001-18607001                                                                                                                                                                                 |
| Mixed Dish with meat          | Casseroles (beef, pork, chicken), curries (beef, pork, chicken), beef Bolognese sauce, stir-fry (beef, pork, chicken), coated chicken, chicken nuggets, and meatloaf           | 18701001-18903054                                                                                                                                                                                 |
| Dairy milk                    | Fluid milk, condensed milk, and milk powder                                                                                                                                    | 19101001-19109004                                                                                                                                                                                 |
| Yoghurt                       | Plain and flavored yogurts                                                                                                                                                     | 19201001-19212002                                                                                                                                                                                 |
| Cream                         | Cream, sour cream, and whipped cream                                                                                                                                           | 19301001-19306004                                                                                                                                                                                 |
| Cheese                        | Cheese                                                                                                                                                                         | 19401001-19408004                                                                                                                                                                                 |
| Flavored milk                 | Iced coffee, milk with flavoring, milkshakes, thickshakes, and fruit smoothies with milk                                                                                       | 19801001-19806007                                                                                                                                                                                 |
| Dairy milk substitutes        | Soy beverages and rice beverages including smoothies and milkshakes, and soy based yogurts                                                                                     | 20101001-20502003                                                                                                                                                                                 |
| Meat substitutes and dishes   | Vegetarian sausages, tofu, tempeh, veggie burgers, stir-fry with tofu                                                                                                          | 20601001-20701004                                                                                                                                                                                 |
| Soup                          | Homemade, canned, and soups prepared from dry mixes                                                                                                                            | 21101001-21602002                                                                                                                                                                                 |
| Seeds and nuts                | Chia seeds, nuts (peanuts, almonds, pistachio, pine), peanut butter, satay sauce, and coconut milk                                                                             | 22101001-22205019                                                                                                                                                                                 |
| Savory sauces                 | Gravies, barbecue sauce, tomato sauce, soy sauce, curry paste, tabasco sauce, sweet and sour sauce, and cheese sauce                                                           | 23101001-23110002                                                                                                                                                                                 |
| Dressings, stuffings, dips    | Chutney, pickled vegetables, salad dressing, mayonnaise, tartare sauce, balsamic vinegar, dairy-based dips, guacamole, and hummus                                              | 23201001-23202010;<br>23301001-23305002;<br>23401001;<br>23501001-23504003                                                                                                                        |
| Potatoes                      | Baked, boiled, fried, grilled, or BBQ'd potatoes. Fries, hashbrowns, and wedges. Baked potatoes with additions (cream, cheese, meat, sour cream)                               | 24101001-24103021                                                                                                                                                                                 |
| Vegetables (non-potato)       | Vegetables (including sweet potato), vegetables cook with and without fat                                                                                                      | 24201001-24803034                                                                                                                                                                                 |
| Vegetable dishes              | Vegetable casseroles, vegetable curries with (rice, noodles), vegetable stir-fry, vegetable salads with additions (cheese, fruit, nuts meat, eggs), coleslaw, and potato salad | 24901001-24905023                                                                                                                                                                                 |
| Legumes and legume dishes     | Beans, lentils, baked beans plain and in (sauces, curry, salads and casseroles)                                                                                                | 25101001-25202016                                                                                                                                                                                 |
| Savory snacks                 | Potato crisps, potato straws, corn chips, popcorn with additions (salt, butter), extruded snacks, snack mixes, and pretzels                                                    | 26101001-26401016                                                                                                                                                                                 |
| Sugar, honey, syrups          | Sugar, honey, and maple syrups                                                                                                                                                 | 27101001-27102005                                                                                                                                                                                 |
| Jams and spreads              | Fruit jams, chocolate/hazelnut spread                                                                                                                                          | 27201001-27205003                                                                                                                                                                                 |
| Confectionary                 | Chocolate, bars, licorice, honeycomb, lollies, marshmallows, and chewing gum                                                                                                   | 28101001-28104001;<br>28401001-28405003                                                                                                                                                           |
| Muesli and cereal bars        | Fruit bars, fruit leathers, muesli bars with and without coatings or chocolate chips                                                                                           | 28201001-28202008;<br>28301001-28305004                                                                                                                                                           |
| Alcohol                       | Beer, wine, spirits, and mixed drinks                                                                                                                                          | 29101001-29505003                                                                                                                                                                                 |
| Formula dietary foods         | Meal replacements (powders, beverages, bars). Sport and protein beverages and powders. Supplementary and medical foods (beverages and powders)                                 | 30101001-30107006                                                                                                                                                                                 |
| Miscellaneous                 | Yeast spreads, intense-sweeteners (aspartame, sucralose, saccharin), salt, dried spices, stock (dry powder, cube, or liquid)                                                   | 31101001-31503011                                                                                                                                                                                 |

<sup>1</sup>The foods listed in the description are not comprehensive and serve to provide examples of foods and beverages included in a given food group. A comprehensive list for each food group is provided with the 8-digit food codes.

<sup>2</sup>Available 8-digit food codes were allocated to the 52 food groups; however, the 14-18 year olds in the sample did not report consuming all of the 8-digit food codes available.

Supplementary Table S2: Prevalence of consumers of each food group at each eating occasion<sup>1</sup>

| Food Groups                                    | OVERALL     |      | Breakfast   |      | Lunch       |      | Dinner      |      | Other combined |      |
|------------------------------------------------|-------------|------|-------------|------|-------------|------|-------------|------|----------------|------|
|                                                | % consumers | Rank | % consumers    | Rank |
| Water                                          | 87.8%       | 1    | 7.0%        | 10   | 10.7%       | 10   | 9.8%        | 12   | 78.7%          | 1    |
| Bread and rolls                                | 64.9%       | 2    | 28.2%       | 3    | 34.4%       | 1    | 13.0%       | 7    | 15.9%          | 8    |
| Sweetened beverages                            | 60.8%       | 3    | 6.7%        | 11   | 21.5%       | 2    | 23.4%       | 4    | 31.0%          | 4    |
| Dairy milk                                     | 56.8%       | 4    | 39.8%       | 1    | 3.3%        | 25   | 5.0%        | 20   | 23.6%          | 6    |
| Desserts                                       | 48.7%       | 5    | 0.4%        | 37   | 6.8%        | 16   | 10.8%       | 10   | 40.6%          | 2    |
| Fruit                                          | 46.6%       | 6    | 6.4%        | 13   | 11.6%       | 9    | 3.4%        | 24   | 35.9%          | 3    |
| Vegetables (non-potato)                        | 42.5%       | 7    | 2.0%        | 23   | 17.1%       | 3    | 26.5%       | 2    | 7.8%           | 16   |
| Fats and oils                                  | 38.0%       | 8    | 18.9%       | 5    | 15.0%       | 4    | 7.1%        | 16   | 8.5%           | 15   |
| Meat                                           | 37.5%       | 9    | 1.1%        | 28   | 11.7%       | 8    | 27.1%       | 1    | 4.1%           | 22   |
| Potatoes                                       | 36.0%       | 10   | 1.2%        | 26   | 9.6%        | 11   | 23.7%       | 3    | 4.8%           | 20   |
| Cheese                                         | 31.8%       | 11   | 2.3%        | 22   | 14.7%       | 5    | 9.2%        | 13   | 9.6%           | 13   |
| Breakfast cereal                               | 30.9%       | 12   | 29.1%       | 2    | 0.8%        | 43   | 0.3%        | 45   | 2.2%           | 33   |
| Confectionary                                  | 29.5%       | 13   | 0.5%        | 35   | 2.3%        | 33   | 1.5%        | 34   | 26.0%          | 5    |
| Sugar, honey and syrups                        | 29.1%       | 14   | 19.6%       | 4    | 2.9%        | 29   | 0.9%        | 38   | 11.2%          | 11   |
| Savoury sauces                                 | 28.9%       | 15   | 2.7%        | 19   | 12.7%       | 7    | 13.2%       | 6    | 5.6%           | 19   |
| Mixed dishes with meat                         | 28.4%       | 16   | 0.4%        | 38   | 7.4%        | 12   | 21.1%       | 5    | 0.9%           | 42   |
| Tea and coffee                                 | 26.5%       | 17   | 12.7%       | 6    | 2.7%        | 31   | 1.6%        | 33   | 14.5%          | 9    |
| Processed meat                                 | 25.5%       | 18   | 6.2%        | 14   | 14.1%       | 6    | 4.6%        | 21   | 3.2%           | 27   |
| Fruit and vegetable juices                     | 22.2%       | 19   | 9.4%        | 8    | 3.7%        | 21   | 5.4%        | 19   | 7.1%           | 17   |
| Savory snacks                                  | 21.7%       | 20   | 0.3%        | 42   | 3.6%        | 22   | 1.3%        | 35   | 17.4%          | 7    |
| Dressing, stuffing, dips                       | 17.2%       | 21   | 0.0%        | 48   | 7.1%        | 14   | 7.6%        | 14   | 3.9%           | 23   |
| Burgers                                        | 16.6%       | 22   | 0.3%        | 44   | 7.2%        | 13   | 7.3%        | 15   | 2.8%           | 28   |
| Savoury biscuits                               | 16.0%       | 23   | 0.7%        | 32   | 3.2%        | 26   | 0.2%        | 46   | 12.3%          | 10   |
| Miscellaneous                                  | 15.9%       | 24   | 7.2%        | 9    | 4.9%        | 17   | 2.9%        | 27   | 2.7%           | 30   |
| Eggs and egg dishes                            | 15.6%       | 25   | 9.9%        | 7    | 1.9%        | 36   | 3.3%        | 25   | 0.6%           | 46   |
| Pasta and dumpling dishes                      | 15.0%       | 26   | 0.3%        | 43   | 3.9%        | 20   | 9.9%        | 11   | 2.2%           | 32   |
| Rice, grains and flours                        | 14.8%       | 27   | 1.9%        | 24   | 3.3%        | 24   | 11.3%       | 8    | 1.0%           | 40   |
| Liquid breakfast meals and fortified beverages | 14.7%       | 28   | 6.5%        | 12   | 0.1%        | 49   | 0.1%        | 47   | 8.7%           | 14   |
| Muesli and cereal bars                         | 14.2%       | 29   | 0.2%        | 45   | 2.8%        | 30   | 0.4%        | 43   | 11.0%          | 12   |
| Vegetable dishes                               | 13.3%       | 30   | 0.0%        | 49   | 2.4%        | 32   | 11.0%       | 9    | 0.5%           | 49   |
| Savoury pastries                               | 12.8%       | 31   | 0.9%        | 29   | 7.0%        | 15   | 3.0%        | 26   | 3.3%           | 26   |
| Fish and fish mixed dishes                     | 12.4%       | 32   | 0.6%        | 34   | 4.1%        | 19   | 6.8%        | 17   | 1.8%           | 34   |
| Flavoured milk                                 | 11.8%       | 33   | 2.6%        | 20   | 2.1%        | 35   | 0.9%        | 37   | 6.4%           | 18   |
| Nuts and seeds                                 | 11.7%       | 34   | 5.0%        | 15   | 3.0%        | 28   | 0.4%        | 44   | 3.4%           | 25   |
| Pasta and noodles                              | 11.4%       | 35   | 0.4%        | 39   | 4.6%        | 18   | 4.4%        | 22   | 2.6%           | 31   |
| Pizza                                          | 8.6%        | 36   | 0.4%        | 40   | 1.6%        | 38   | 6.2%        | 18   | 0.5%           | 48   |
| Yoghurt                                        | 8.3%        | 37   | 2.3%        | 21   | 1.2%        | 40   | 0.8%        | 39   | 4.2%           | 21   |
| Jams and spreads                               | 8.1%        | 38   | 2.9%        | 18   | 1.8%        | 37   | 0.6%        | 40   | 3.5%           | 24   |
| Rice dishes and sushi                          | 7.5%        | 39   | 0.0%        | 47   | 3.5%        | 23   | 3.9%        | 23   | 1.0%           | 41   |
| Soup                                           | 6.3%        | 40   | 0.6%        | 33   | 2.1%        | 34   | 2.7%        | 29   | 0.8%           | 43   |
| Sandwiches                                     | 6.1%        | 41   | 0.4%        | 36   | 3.0%        | 27   | 1.7%        | 32   | 1.2%           | 39   |
| Batter-based products                          | 4.8%        | 42   | 3.0%        | 17   | 0.0%        | 50   | 0.5%        | 42   | 1.2%           | 38   |
| Legumes and legume dishes                      | 4.4%        | 43   | 1.4%        | 25   | 0.8%        | 44   | 2.9%        | 28   | 0.2%           | 50   |

|                               |      |    |      |    |      |    |      |    |      |    |
|-------------------------------|------|----|------|----|------|----|------|----|------|----|
| Alcohol                       | 4.2% | 44 | 0.0% | 49 | 0.2% | 46 | 1.3% | 36 | 2.7% | 29 |
| Tacos                         | 4.2% | 45 | 0.0% | 49 | 1.2% | 41 | 2.4% | 30 | 0.7% | 45 |
| Cream                         | 3.5% | 46 | 0.1% | 46 | 0.8% | 42 | 1.8% | 31 | 0.8% | 44 |
| Commercial fruit, dried fruit | 3.4% | 47 | 0.3% | 41 | 1.4% | 39 | 0.5% | 41 | 1.2% | 37 |
| Hot porridge                  | 3.1% | 48 | 3.0% | 16 | 0.0% | 51 | 0.0% | 50 | 0.1% | 52 |
| Formula dietary foods         | 2.4% | 49 | 0.8% | 30 | 0.1% | 48 | 0.1% | 49 | 1.4% | 36 |
| Muffins and scones            | 2.4% | 50 | 0.7% | 31 | 0.5% | 45 | 0.0% | 50 | 1.4% | 35 |
| Dairy milk substitutes        | 1.7% | 51 | 1.1% | 27 | 0.1% | 47 | 0.0% | 50 | 0.5% | 47 |
| Meat substitutes and dishes   | 0.2% | 52 | 0.0% | 49 | 0.0% | 51 | 0.1% | 48 | 0.1% | 51 |

<sup>1</sup>Breakfast is defined as the self-defined eating occasion ‘breakfast’; Lunch includes ‘lunch’ and ‘brunch’; Dinner is ‘dinner’ only; and other combined the total of ‘morning tea’, ‘afternoon tea’, ‘snack’, ‘supper’, ‘beverage/drink’, ‘extended consumption’, and ‘other’.

**Supplementary Table S3: Mean energy intake (kJ) per capita for each food group (and grams for selected food groups) by eating occasion.**

| Food Groups                   | Total              |      | Breakfast          |      | Lunch              |      | Dinner             |      | Other EO combined  |      |
|-------------------------------|--------------------|------|--------------------|------|--------------------|------|--------------------|------|--------------------|------|
|                               | Grams (mean ± SE*) | Rank |
| Water                         | 1123.7 ± 32.5      | 1    | 48.6 ± 8.9         | 1    | 45.6 ± 6.3         | 1    | 46.2 ± 6.0         | 1    | 983.1 ± 33.3       | 1    |
| Fruit                         | 103.0 ± 5.9        | 2    | 9.7 ± 1.5          | 4    | 19.8 ± 2.4         | 2    | 6.0 ± 1.5          | 5    | 67.4 ± 4.9         | 2    |
| Fruit and vegetable juice     | 88.2 ± 7.3         | 3    | 30.8 ± 3.7         | 2    | 12.2 ± 2.4         | 5    | 20.2 ± 3.9         | 4    | 25.1 ± 3.6         | 4    |
| Tea and coffee                | 85.7 ± 6.4         | 4    | 27.6 ± 2.7         | 3    | 5.3 ± 1.2          | 6    | 4.9 ± 1.7          | 6    | 47.9 ± 5.0         | 3    |
| Potatoes                      | 56.2 ± 4.2         | 5    | 1.2 ± 0.4          | 6    | 16.0 ± 2.7         | 3    | 34.9 ± 3.1         | 2    | 4.2 ± 0.8          | 6    |
| Vegetables (non-potato)       | 51.3 ± 3.4         | 6    | 1.4 ± 0.5          | 5    | 13.1 ± 1.5         | 4    | 31.3 ± 2.7         | 3    | 5.5 ± 1.0          | 5    |
| Commercial fruit, dried fruit | 4.5 ± 1.1          | 7    | 0.4 ± 0.3          | 7    | 2.5 ± 0.9          | 7    | 0.4 ± 0.3          | 7    | 1.2 ± 0.6          | 7    |
| Food Groups                   | kJ (mean ± SE*)    | Rank |
| Desserts                      | 798.8 ± 45.8       | 1    | 8.6 ± 5.9          | 25   | 85.9 ± 14.0        | 8    | 142.7 ± 19.4       | 7    | 561.6 ± 37.7       | 1    |
| Bread, rolls                  | 741.0 ± 29.1       | 2    | 197.7 ± 13.8       | 3    | 309.7 ± 18.4       | 1    | 92.7 ± 10.0        | 11   | 140.6 ± 13.1       | 8    |
| Meat                          | 543.5 ± 37.1       | 3    | 7.9 ± 3.8          | 27   | 120.9 ± 18.0       | 7    | 386.0 ± 30.5       | 1    | 28.8 ± 5.8         | 23   |
| Sweetened beverages           | 516.2 ± 26.4       | 4    | 32.7 ± 5.1         | 10   | 123.4 ± 10.5       | 6    | 127.3 ± 10.3       | 9    | 232.7 ± 17.3       | 2    |
| Mixed dish with meat          | 498.9 ± 35.6       | 5    | 3.4 ± 2.1          | 37   | 138.4 ± 22.0       | 5    | 347.8 ± 28.5       | 2    | 9.3 ± 4.8          | 37   |
| Potatoes                      | 440.5 ± 34.3       | 6    | 12.2 ± 4.1         | 21   | 145.3 ± 23.7       | 3    | 242.7 ± 23.7       | 3    | 40.4 ± 7.6         | 17   |
| Dairy milk                    | 397.7 ± 21.9       | 7    | 204.0 ± 12.5       | 2    | 10.4 ± 3.1         | 33   | 18.0 ± 4.2         | 26   | 165.2 ± 15.3       | 5    |
| Burgers                       | 386.8 ± 36.0       | 8    | 6.7 ± 5.1          | 30   | 157.5 ± 22.7       | 2    | 169.9 ± 23.7       | 6    | 52.7 ± 12.1        | 12   |
| Pasta and dumpling dishes     | 316.7 ± 34.3       | 9    | 0.4 ± 0.3          | 46   | 77.5 ± 16.6        | 9    | 205.6 ± 26.1       | 4    | 33.2 ± 9.4         | 18   |
| Breakfast cereal              | 312.2 ± 21.9       | 10   | 277.6 ± 18.9       | 1    | 5.4 ± 2.5          | 39   | 0.8 ± 0.5          | 45   | 28.4 ± 8.2         | 24   |
| Savoury pastries              | 253.8 ± 29.6       | 11   | 13.7 ± 6.2         | 19   | 140.6 ± 20.4       | 4    | 56.8 ± 14.4        | 16   | 42.7 ± 9.9         | 16   |
| Confectionary                 | 252.9 ± 23.7       | 12   | 1.7 ± 1.1          | 41   | 14.8 ± 4.9         | 31   | 10.8 ± 4.0         | 32   | 225.5 ± 23.0       | 3    |
| Pizza                         | 251.4 ± 34.6       | 13   | 10.4 ± 6.5         | 23   | 41.5 ± 13.5        | 16   | 194.4 ± 31.6       | 5    | 5.0 ± 2.8          | 43   |
| Fruit                         | 236.6 ± 12.4       | 14   | 21.1 ± 3.4         | 15   | 46.7 ± 5.9         | 13   | 13.3 ± 3.5         | 30   | 155.5 ± 9.9        | 6    |
| Savory snacks                 | 215.1 ± 23.1       | 15   | 2.0 ± 1.7          | 40   | 22.0 ± 4.6         | 22   | 12.2 ± 5.0         | 31   | 178.9 ± 22.1       | 4    |
| Rice, grains and flours       | 210.0 ± 22.8       | 16   | 16.6 ± 5.2         | 17   | 42.6 ± 9.9         | 15   | 131.3 ± 14.8       | 8    | 19.4 ± 8.0         | 30   |
| Pasta and noodles             | 202.0 ± 28.0       | 17   | 5.4 ± 3.2          | 32   | 62.8 ± 11.8        | 11   | 103.8 ± 24.3       | 10   | 30.0 ± 7.2         | 22   |
| Flavoured milk                | 195.5 ± 22.6       | 18   | 31.7 ± 7.5         | 12   | 27.5 ± 7.7         | 19   | 16.7 ± 6.9         | 27   | 119.6 ± 18.9       | 9    |
| Savoury biscuits              | 170.5 ± 19.9       | 19   | 2.1 ± 1.0          | 39   | 23.2 ± 5.8         | 21   | 2.8 ± 2.1          | 36   | 142.4 ± 19.1       | 7    |
| Cheese                        | 170.3 ± 12.4       | 20   | 8.6 ± 2.5          | 24   | 65.6 ± 6.6         | 10   | 39.6 ± 6.4         | 19   | 56.3 ± 8.4         | 11   |
| Sandwiches                    | 144.5 ± 23.4       | 21   | 11.6 ± 7.2         | 22   | 60.7 ± 14.5        | 12   | 40.6 ± 12.4        | 18   | 31.6 ± 10.8        | 21   |
| Rice dishes and sushi         | 136.2 ± 20.4       | 22   | 1.4 ± 2.2          | 43   | 43.0 ± 8.9         | 14   | 80.4 ± 16.2        | 12   | 11.5 ± 4.9         | 35   |
| Tacos                         | 123.1 ± 24.0       | 23   | 0.0 ± N/A          | 48   | 21.2 ± 7.6         | 25   | 78.2 ± 20.4        | 13   | 23.6 ± 10.7        | 28   |

|                                                   |              |    |             |    |             |    |             |    |             |    |
|---------------------------------------------------|--------------|----|-------------|----|-------------|----|-------------|----|-------------|----|
| Fruit and vegetable juice                         | 114.7 ± 9.6  | 24 | 39.6 ± 4.8  | 8  | 15.8 ± 3.1  | 30 | 27.2 ± 5.6  | 23 | 32.0 ± 4.6  | 20 |
| Fats and oils                                     | 112.0 ± 9.3  | 25 | 41.7 ± 4.3  | 7  | 28.2 ± 3.2  | 18 | 16.2 ± 3.1  | 28 | 26.0 ± 5.9  | 27 |
| Processed meat                                    | 111.6 ± 10.7 | 26 | 35.2 ± 5.6  | 9  | 35.7 ± 4.5  | 17 | 26.2 ± 6.3  | 24 | 14.5 ± 4.7  | 33 |
| Fish and fish mixed dish                          | 101.2 ± 13.9 | 27 | 1.5 ± 0.9   | 42 | 21.2 ± 5.4  | 26 | 67.6 ± 11.9 | 14 | 10.9 ± 3.4  | 36 |
| Vegetables (non-potato)                           | 91.9 ± 7.8   | 28 | 4.7 ± 2.0   | 34 | 21.8 ± 4.3  | 23 | 57.8 ± 6.0  | 15 | 7.7 ± 1.6   | 39 |
| Muesli and cereal bars                            | 88.5 ± 9.3   | 29 | 4.2 ± 4.3   | 35 | 16.4 ± 3.9  | 29 | 2.1 ± 1.2   | 39 | 65.8 ± 7.4  | 10 |
| Muffins and scones                                | 87.4 ± 24.5  | 30 | 19.5 ± 8.5  | 16 | 21.4 ± 11.5 | 24 | 0.0 ± N/A   | 49 | 46.5 ± 17.5 | 14 |
| Eggs and egg dishes                               | 78.1 ± 8.3   | 31 | 50.8 ± 7.0  | 5  | 7.5 ± 2.2   | 37 | 15.4 ± 3.4  | 29 | 4.3 ± 2.4   | 45 |
| Sugar,honey, syrups                               | 77.3 ± 6.5   | 32 | 44.6 ± 5.1  | 6  | 4.9 ± 1.1   | 40 | 1.3 ± 0.6   | 41 | 26.6 ± 3.3  | 25 |
| Liquid breakfast, fortified beverages (like Milo) | 75.9 ± 8.4   | 33 | 32.3 ± 5.4  | 11 | 0.2 ± 0.2   | 49 | 0.2 ± 0.4   | 48 | 43.2 ± 6.3  | 15 |
| Dressing, stuffing, dips                          | 72.0 ± 9.1   | 34 | 0.0 ± 0.1   | 47 | 26.6 ± 4.5  | 20 | 28.7 ± 6.4  | 21 | 16.6 ± 4.6  | 32 |
| Seeds and nuts                                    | 68.5 ± 11.4  | 35 | 23.1 ± 4.7  | 13 | 10.0 ± 2.5  | 34 | 2.7 ± 5.6   | 37 | 32.6 ± 8.3  | 19 |
| Vegetable dishes                                  | 66.0 ± 13.9  | 36 | 0.0 ± N/A   | 48 | 8.2 ± 3.5   | 36 | 53.8 ± 12.3 | 17 | 4.0 ± 2.7   | 46 |
| Legumes and legume dishes                         | 64.4 ± 23.1  | 37 | 14.1 ± 5.1  | 18 | 19.9 ± 11.1 | 27 | 27.6 ± 8.4  | 22 | 2.8 ± 3.6   | 47 |
| Alcohol                                           | 60.6 ± 15.9  | 38 | 0.0 ± N/A   | 48 | 0.7 ± 0.6   | 45 | 7.8 ± 2.7   | 34 | 52.1 ± 15.7 | 13 |
| Savoury sauces                                    | 55.6 ± 6.7   | 39 | 2.2 ± 0.6   | 38 | 17.2 ± 2.9  | 28 | 31.6 ± 5.7  | 20 | 4.7 ± 1.1   | 44 |
| Hot porridge                                      | 55.2 ± 13.6  | 40 | 54.2 ± 13.6 | 4  | 0.0 ± N/A   | 50 | 0.0 ± N/A   | 49 | 1.0 ± 1.6   | 49 |
| Yoghurt                                           | 48.7 ± 7.3   | 41 | 12.3 ± 3.4  | 20 | 8.4 ± 3.5   | 35 | 1.5 ± 0.6   | 40 | 26.5 ± 5.0  | 26 |
| Soup                                              | 45.9 ± 8.0   | 42 | 5.6 ± 2.6   | 31 | 14.6 ± 4.0  | 32 | 18.6 ± 5.6  | 25 | 7.1 ± 3.3   | 40 |
| Jams and spreads                                  | 34.2 ± 7.1   | 43 | 8.3 ± 2.0   | 26 | 4.1 ± 1.5   | 41 | 2.7 ± 1.3   | 38 | 19.1 ± 6.5  | 31 |
| Tea and coffee                                    | 31.2 ± 4.7   | 44 | 7.6 ± 1.5   | 28 | 1.2 ± 0.8   | 44 | 0.6 ± 0.3   | 46 | 21.8 ± 4.2  | 29 |
| Batter-based products                             | 30.2 ± 6.2   | 45 | 21.7 ± 5.7  | 14 | 0.4 ± 0.6   | 48 | 3.1 ± 1.7   | 35 | 5.1 ± 1.7   | 42 |
| Cream                                             | 21.3 ± 6.1   | 46 | 0.6 ± 0.6   | 45 | 3.8 ± 1.7   | 42 | 8.5 ± 3.3   | 33 | 8.4 ± 4.8   | 38 |
| Formula dietary foods                             | 19.1 ± 5.6   | 47 | 5.2 ± 2.5   | 33 | 0.4 ± 0.6   | 47 | 1.0 ± 1.2   | 43 | 11.9 ± 4.9  | 34 |
| Commercial fruit, dried fruit                     | 14.1 ± 3.2   | 48 | 1.3 ± 0.8   | 44 | 6.6 ± 2.3   | 38 | 0.9 ± 0.7   | 44 | 5.4 ± 2.0   | 41 |
| Dairy milk substitutes                            | 9.6 ± 3.7    | 49 | 7.2 ± 3.4   | 29 | 0.5 ± 0.5   | 46 | 0.0 ± N/A   | 49 | 2.0 ± 1.1   | 48 |
| Miscellaneous                                     | 6.4 ± 0.8    | 50 | 3.4 ± 0.6   | 36 | 2.0 ± 0.4   | 43 | 0.4 ± 0.1   | 47 | 0.6 ± 0.2   | 51 |
| Meat substitutes and dishes                       | 2.1 ± 1.6    | 51 | 0.0 ± N/A   | 48 | 0.0 ± N/A   | 50 | 1.2 ± 1.4   | 42 | 0.9 ± 0.9   | 50 |
| Water                                             | 0.4 ± 0.5    | 52 | 0.0 ± 0.0   | 48 | 0.0 ± 0.0   | 50 | 0.0 ± 0.0   | 49 | 0.4 ± 0.5   | 52 |

<sup>1</sup>Breakfast is defined as the self-defined eating occasion ‘breakfast’; Lunch includes ‘lunch’ and ‘brunch’; Dinner is ‘dinner’ only; and other combined the total of ‘morning tea’, ‘afternoon tea’, ‘snack’, ‘supper’, ‘beverage/drink’, ‘extended consumption’, and ‘other’. \*SE = standard error.
